# Supplementary material for: Discrimination of chiral copper(ii) complexes upon binding of galactonoamidine ligands
Source: Royal Society of Chemistry journal article supplement (doi:10.1039/c6dt02153k), 2016-01-01
Supplement: c6dt02153k1.pdf [file c6dt02153k1.pdf]

## Discrimination of chiral copper(II) complexes upon binding of galactonoamidine ligands

Susanne Striegler\* and Jessica B. Pickens

*University of Arkansas, Department of Chemistry and Biochemistry, 345 N Campus Drive,  
Fayetteville, AR 72701, USA*

\*Corresponding author, phone: +1-479-575-5079; fax: +1-479-575-4049;  
e-mail: [Susanne.Striegler@uark.edu](mailto:Susanne.Striegler@uark.edu)

|                                                                                        |          |
|----------------------------------------------------------------------------------------|----------|
| <b>Content:</b>                                                                        | <b>1</b> |
| <hr/>                                                                                  |          |
| <b>Binding constants for the speciation data of</b>                                    | <b>2</b> |
| • Cu <sub>2</sub> bpdpo ( <b>2</b> ) and galactonoamidine <b>1</b>                     |          |
| <b>Coordinates (Å) and energies of a complex derived from</b>                          | <b>3</b> |
| • <i>S</i> - <b>3</b> and galactonoamidine <b>1</b> , species I (three binding sites)  | 3        |
| • <i>S</i> - <b>3</b> and galactonoamidine <b>1</b> , species II (three binding sites) | 5        |
| • <i>S</i> - <b>3</b> and galactonoamidine <b>1</b> (two binding sites, hypothetical)  | 7        |
| • <i>R</i> - <b>3</b> and galactonoamidine <b>1</b> (two binding sites)                | 9        |

## Binding constants for the speciation data of Cu<sub>2</sub>bpdpo (2) and galactonoamidine (1)

The complex formation was characterized by the following general equilibrium:

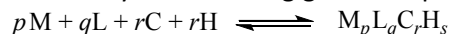

$$\beta = \frac{M_pL_qC_rH_s}{[M]^p[L]^q[C]^r[H]^s}$$

where M refers to the metal ion and L to the non-protonated ligand. The corresponding binding constants [ $\beta(M_pL_qC_rH_s) \equiv \beta_{pqrs}$ ] were calculated using the computer program Specfit. The ligand protonation and complex formation constants were calculated from 2-4 independent titration experiments with 40-50 data points each.

Logarithmic formation constants for Cu<sub>2</sub>bpdpo of galactonoamidine **1** ( $T = 303K$ ,  $I = 0.1 M$  (NaClO<sub>4</sub>));  $\beta_{pqrs} = [M_pL_qC_rH_s]/[M]^p [L]^q [C]^r [H]^s$  with calculated standard deviation. The formation constants of the metal complex were previously determined by T. Gajda, M. S. Jancsó, H. Lönnberg and H. Sirges, *J. Chem. Soc., Dalton Trans.* **2002**, 1757-1763; and S. Striegler and M. Dittel, *J. Am. Chem. Soc.*, **2003**, 125, 11518-11524 and kept fixed during the calculation here.

| <i>pqrs</i> | $\beta_{pqrs} \pm \Delta\beta_{pqrs}$ |
|-------------|---------------------------------------|
| 0100        | 0                                     |
| 0101        | 12.3824                               |
| 0102        | 21.9798                               |
| 0103        | 29.2228                               |
| 0104        | 34.3746                               |
| 1100        | 15.2400                               |
| 2100        | 23.3355                               |
| 210-1       | 16.0386                               |
| 210-2       | 4.7476                                |
| 210-3       | -7.93647                              |
| 211-1       | 19.4770 ± 0.04181                     |
| 211-2       | 12.7233 ± 0.03286                     |
| 211-3       | 3.0797 ± 0.05095                      |
| 211-4       | -8.8437 ± 0.15302                     |
| 211-5       | -22.1596 ± 0.19042                    |

### Coordinates (Å) and energies of a complex derived from S-3 and galactonoamidine 1, species I:

- **Gas phase**

Total Energy = -5151.577763223Eh; -3,232,663.828 kcal/mol

Standard thermodynamic quantities at 298.180 K and 1.000 ATM:

- This Molecule has 0 Imaginary Frequencies
- Zero point vibrational energy: 426.591 kcal/mol
- Total Enthalpy: 452.667 kcal/mol
- Total Entropy: 243.922 cal/mol K

- **COSMO (Solvent = water)**

Total Energy = -5151.661192258 Eh; -3232716.180 kcal/mol

Total energy + OC corr. = -5151.658306582 Eh

Dielectric energy = -0.095890678 Eh

Dielectric energy + OC corr. = -0.093005002 Eh

*α-spin:*

E = -0.056 Eh (LUMO)

E = -0.188Eh (HOMO)

*β-spin:*

E = -0.100 Eh (LUMO)

E = -0.185 Eh (HOMO)

#### Coordinates (Å)

| ATOM | X         | Y         | Z         |
|------|-----------|-----------|-----------|
| N    | -2.735562 | 0.651107  | 2.634386  |
| C    | -3.438256 | 1.926598  | 2.701904  |
| C    | -2.781480 | 3.138379  | 1.928590  |
| C    | -1.520456 | 2.678191  | 1.205959  |
| C    | -1.880757 | 1.380225  | 0.442982  |
| C    | -2.043608 | 0.362507  | 1.570879  |
| H    | -3.441555 | 2.206004  | 3.766235  |
| H    | -2.848358 | 1.540801  | -0.052939 |
| H    | -0.833905 | -1.258159 | 3.429801  |
| C    | -4.914881 | 1.727295  | 2.305176  |
| H    | -2.519452 | 3.921441  | 2.654432  |
| H    | -0.716561 | 2.466801  | 1.913744  |
| O    | 1.324709  | 1.219510  | 0.754344  |
| H    | 0.201530  | -7.519175 | 0.574209  |
| H    | -5.346494 | 0.925494  | 2.914810  |
| H    | -4.994081 | 1.434655  | 1.255747  |
| O    | -5.680362 | 2.937656  | 2.423077  |
| O    | -3.595691 | 3.705144  | 0.899220  |
| H    | -1.801617 | 4.120986  | -0.052757 |
| O    | -1.012461 | 3.698706  | 0.338961  |
| H    | -0.142101 | -7.862706 | 2.270282  |
| H    | -1.547392 | -5.773513 | 0.291422  |
| H    | -5.769361 | 3.151743  | 3.365435  |
| H    | -4.482308 | 3.849004  | 1.289409  |
| H    | 3.340435  | 4.462843  | -2.177937 |
| C    | 0.403463  | -7.187623 | 1.598118  |
| N    | -1.347528 | -0.798452 | 1.425112  |
| H    | -2.292702 | -3.453347 | 0.699322  |
| H    | 1.471010  | -7.328336 | 1.798850  |
| C    | -1.392913 | -1.689110 | 2.584409  |
| H    | -2.432052 | -1.743627 | 2.935088  |

|    |           |           |           |
|----|-----------|-----------|-----------|
| H  | 1.385626  | -5.378788 | 3.402625  |
| C  | -0.886441 | -3.082768 | 2.287224  |
| C  | -1.481884 | -3.871373 | 1.290554  |
| C  | -1.056835 | -5.179860 | 1.060085  |
| C  | -0.019417 | -5.753040 | 1.813071  |
| C  | 0.582368  | -4.961450 | 2.799334  |
| C  | 0.152372  | -3.651857 | 3.035882  |
| H  | 0.614963  | -3.072248 | 3.833687  |
| H  | 2.294988  | -4.092685 | -2.766875 |
| H  | -1.967599 | 4.195671  | -4.711755 |
| Cu | 0.586350  | 2.210183  | -0.688596 |
| O  | -0.939360 | 1.001006  | -0.543290 |
| Cu | 0.093300  | -0.622232 | 0.132276  |
| H  | -0.038452 | -1.256869 | -5.032727 |
| H  | 2.946915  | -0.139792 | 2.441272  |
| H  | 3.454491  | 1.282087  | -1.050311 |
| H  | 4.419883  | 0.252364  | 1.572679  |
| C  | 2.684401  | 1.422142  | 0.992402  |
| C  | 3.339035  | 0.102077  | 1.445611  |
| H  | 2.827852  | 2.148740  | 1.815903  |
| H  | 3.929058  | -1.838745 | 0.713714  |
| C  | 3.355929  | 2.034973  | -0.260867 |
| H  | 4.355010  | 2.436485  | -0.042405 |
| H  | 2.411993  | 3.874234  | -0.148787 |
| C  | 3.135838  | -1.102055 | 0.515602  |
| H  | 1.696121  | -2.138775 | 1.582678  |
| H  | 3.245770  | -0.807264 | -0.533495 |
| N  | 1.819582  | -1.791285 | 0.631253  |
| H  | 1.417445  | -3.303577 | -4.971427 |
| H  | 2.705674  | -3.493225 | -0.329687 |
| C  | 1.752506  | -2.946887 | -0.288164 |
| H  | 0.994419  | -3.637453 | 0.096148  |
| H  | -0.528744 | -0.080655 | -2.858118 |
| C  | 1.671219  | -3.206389 | -2.832586 |
| C  | 1.178653  | -2.764441 | -4.059365 |
| C  | 0.373125  | -1.624981 | -4.098976 |
| C  | 0.098899  | -0.964738 | -2.905879 |
| N  | 0.581870  | -1.388478 | -1.726357 |
| C  | 1.343844  | -2.497044 | -1.676463 |
| N  | 2.444737  | 3.085766  | -0.796774 |
| C  | 2.702764  | 3.571006  | -2.167702 |
| H  | 3.250585  | 2.786366  | -2.703373 |
| H  | -1.677924 | 2.713131  | -2.700017 |
| C  | 1.324039  | 4.690191  | -4.007167 |
| C  | 0.106868  | 4.827400  | -4.673719 |
| C  | -1.003417 | 4.112067  | -4.222131 |
| C  | -0.855235 | 3.289776  | -3.110931 |
| N  | 0.319362  | 3.158528  | -2.471914 |
| C  | 1.399179  | 3.837745  | -2.906366 |
| H  | 2.203655  | 5.237287  | -4.332978 |
| H  | 0.025365  | 5.488690  | -5.531065 |

**Coordinates (Å) and energies of a complex derived from S-3 and galactonoamidine 1, species II:**

- **Gas phase**

Total Energy = -5151.537642881 Eh; -3232638.652 kcal/mol

Standard thermodynamic quantities at 298.180 K and 1.000 ATM:

- This Molecule has 0 Imaginary Frequencies
- Zero point vibrational energy: 425.825 kcal/mol
- Total Enthalpy: 452.296 kcal/mol
- Total Entropy: 249.181 cal/mol K

- **COSMO (Solvent = water)**

Total Energy = -5151.616086340 Eh; -3232687.876 kcal/mol

Total energy + OC corr. = -5151.613003974 Eh

Dielectric energy = -0.085414296 Eh

Dielectric energy + OC corr. = -0.082331930 Eh

*α-spin:*

E = -0.049 Eh (LUMO)

E = -0.195Eh (HOMO)

*β-spin:*

E = -0.096 Eh (LUMO)

E = -0.207Eh (HOMO)

Coordinates (Å)

| ATOM | X         | Y         | Z         |
|------|-----------|-----------|-----------|
| N    | -3.063374 | 0.515549  | 2.375397  |
| C    | -3.615266 | 1.827100  | 2.687042  |
| C    | -2.973858 | 3.086970  | 2.005902  |
| C    | -1.639341 | 2.725143  | 1.367165  |
| C    | -1.867794 | 1.513783  | 0.436953  |
| C    | -2.263374 | 0.361999  | 1.363934  |
| H    | -3.473459 | 1.952035  | 3.772034  |
| H    | -2.743150 | 1.747969  | -0.190032 |
| H    | -1.822694 | -1.701401 | 3.001281  |
| C    | -5.139728 | 1.775303  | 2.439483  |
| H    | -2.811982 | 3.854545  | 2.776011  |
| H    | -0.899168 | 2.466629  | 2.128401  |
| O    | 1.394102  | 1.716959  | 1.470135  |
| H    | 0.398446  | -7.260542 | -0.544368 |
| H    | -5.585431 | 0.980109  | 3.047634  |
| H    | -5.331079 | 1.548502  | 1.388440  |
| O    | -5.769203 | 3.038147  | 2.680019  |
| O    | -3.752563 | 3.642944  | 0.944906  |
| H    | 0.694656  | -0.659292 | 3.635177  |
| O    | -1.083804 | 3.837187  | 0.656143  |
| H    | -0.308856 | -7.924316 | 0.928245  |
| H    | -1.698081 | -5.773421 | -0.726056 |
| H    | -5.787733 | 3.201181  | 3.636130  |
| H    | -4.607897 | 3.897156  | 1.342475  |
| H    | 3.662666  | 4.482532  | -1.657611 |
| C    | 0.322732  | -7.115205 | 0.539030  |
| N    | -1.693073 | -0.850515 | 1.080539  |
| H    | -2.720739 | -3.613896 | -0.114115 |
| H    | 1.320064  | 7.245937  | 0.971055  |
| C    | -2.073586 | -1.958497 | 1.963294  |
| H    | -3.167906 | -2.052508 | 1.950057  |
| H    | 1.016073  | -5.426551 | 2.584978  |

|    |           |           |           |
|----|-----------|-----------|-----------|
| C  | -1.425766 | -3.266832 | 1.574564  |
| C  | -1.889564 | -3.999895 | 0.472114  |
| C  | -1.312672 | -5.220761 | 0.128082  |
| C  | -0.259042 | -5.763317 | 0.880421  |
| C  | 0.204718  | -5.029089 | 1.979233  |
| C  | -0.370223 | -3.801931 | 2.321275  |
| H  | 0.009279  | -3.255939 | 3.181666  |
| H  | 2.700521  | -3.950332 | -2.621766 |
| H  | -0.951402 | 3.135694  | -5.071884 |
| Cu | 0.730024  | 2.393924  | -0.204470 |
| O  | -0.779399 | 1.227916  | -0.405950 |
| Cu | -0.255061 | -0.810463 | -0.161152 |
| H  | -0.603552 | -2.592230 | -5.042711 |
| H  | 3.782859  | -0.101512 | 1.616293  |
| H  | 4.269309  | 3.306939  | 0.760242  |
| H  | 4.485459  | 0.963102  | 0.421396  |
| C  | 2.791524  | 1.829048  | 1.516827  |
| C  | 3.525995  | 0.625185  | 0.836813  |
| H  | 3.114883  | 1.811127  | 2.569776  |
| H  | 3.513802  | -0.666439 | -0.876272 |
| C  | 3.201842  | 3.233015  | 1.002567  |
| H  | 2.991581  | 3.952433  | 1.797931  |
| H  | 1.977915  | 4.567059  | -0.001293 |
| C  | 2.770417  | -0.134688 | -0.268495 |
| H  | 1.812921  | -1.195202 | 1.258914  |
| H  | 2.255355  | 0.551921  | -0.950819 |
| N  | 1.787216  | -1.145345 | 0.232517  |
| H  | 1.453217  | -4.014219 | -4.789065 |
| H  | 3.043724  | -2.756531 | -0.429222 |
| C  | 1.981865  | -2.479655 | -0.362434 |
| H  | 1.490065  | -3.214694 | 0.286233  |
| H  | -1.311109 | -1.168605 | -3.107330 |
| C  | 1.806587  | -3.351438 | -2.767270 |
| C  | 1.109330  | -3.384163 | -3.974055 |
| C  | -0.032429 | -2.595571 | -4.120488 |
| C  | -0.431668 | -1.802466 | -3.049920 |
| N  | 0.237812  | -1.774915 | -1.885955 |
| C  | 1.339312  | -2.539212 | -1.734890 |
| N  | 2.365790  | 3.639610  | -0.167567 |
| C  | 2.997623  | 3.623629  | -1.500633 |
| H  | 3.618258  | 2.721851  | -1.566555 |
| H  | -1.088835 | 2.276245  | -2.693232 |
| C  | 2.085483  | 4.072567  | -3.856395 |
| C  | 1.046775  | 3.919744  | -4.775867 |
| C  | -0.123441 | 3.268652  | -4.383753 |
| C  | -0.217045 | 2.796183  | -3.077699 |
| N  | 0.782780  | 2.949222  | -2.197099 |
| C  | 1.920893  | 3.566865  | -2.568720 |
| H  | 3.006330  | 4.577269  | -4.131909 |
| H  | 1.149346  | 4.308975  | -5.784553 |
| H  | 1.188801  | 0.357189  | 2.555330  |
| O  | 1.420650  | -0.490055 | 3.017625  |
| H  | -1.834649 | 4.240467  | 0.179928  |

**Coordinates (Å) and energies of a hypothetical assembly derived from complex S-3 and galactonoamidine 1 with two binding sites**

- **Gas phase**

Total Energy = -5151.567309033 Eh; -3232657.268 kcal/mol

Standard thermodynamic quantities at 298.180 K and 1.000 ATM:

- This Molecule has 0 Imaginary Frequencies
- Zero point vibrational energy: 426.388 kcal/mol
- Total Enthalpy: 452.137 kcal/mol
- Total Entropy: 241.395 cal/mol K

- **COSMO (Solvent = water)**

Total Energy = -5151.650294119 Eh; -3232709.342 kcal/mol

Total energy + OC corr. = -5151.647197301 Eh

Dielectric energy = -0.096427897 Eh

Dielectric energy + OC corr. = -0.093331079 Eh

*α-spin:*

E = -0.056 Eh (LUMO)

E = -0.183Eh (HOMO)

*β-spin:*

E = -0.116 Eh (LUMO)

E = -0.179Eh (HOMO)

Coordinates (Å)

| ATOM | X         | Y         | Z         |
|------|-----------|-----------|-----------|
| N    | -1.343723 | -1.918304 | -2.806689 |
| C    | -2.109481 | -1.303609 | -3.873669 |
| C    | -2.456917 | 0.193157  | -3.729833 |
| C    | -2.652538 | 0.604085  | -2.271009 |
| C    | -1.426918 | 0.209836  | -1.442565 |
| C    | -1.071436 | -1.281325 | -1.705359 |
| H    | -3.077732 | -1.830397 | -3.954329 |
| H    | -0.580028 | 0.810581  | -1.813494 |
| H    | -0.291725 | -3.766183 | 0.183207  |
| C    | -1.338872 | -1.554206 | -5.186371 |
| H    | -3.390010 | 0.397892  | -4.271916 |
| H    | -3.540303 | 0.110102  | -1.859714 |
| O    | -0.325823 | 0.679724  | 2.180750  |
| H    | -2.280091 | 2.398843  | -2.869585 |
| H    | -1.301547 | -2.631108 | -5.393221 |
| H    | -0.314113 | -1.196220 | -5.061177 |
| O    | -1.866269 | -0.830966 | -6.308389 |
| O    | -1.429800 | 1.060963  | -4.240558 |
| H    | -5.614727 | 6.152031  | 1.452931  |
| O    | -2.905802 | 2.008239  | -2.230917 |
| H    | -4.378713 | 5.425976  | 3.505057  |
| H    | 3.957792  | -2.449973 | -3.097246 |
| H    | -2.771113 | -1.145538 | -6.470536 |
| H    | -1.447072 | 0.928997  | -5.206623 |
| H    | -3.050020 | 3.609796  | 4.597670  |
| H    | 6.063136  | -5.011816 | -1.261279 |
| N    | -0.422150 | -1.853613 | -0.660548 |
| H    | 1.560511  | -2.058354 | -2.639025 |
| C    | -3.325384 | 3.866716  | 2.472057  |
| C    | -0.032086 | -3.253594 | -0.754325 |

|    |           |           |           |
|----|-----------|-----------|-----------|
| H  | -0.623416 | -3.723140 | -1.551236 |
| H  | 4.080462  | -5.373229 | 0.048461  |
| C  | 1.445782  | -3.484996 | -1.030965 |
| C  | 2.114228  | -2.780380 | -2.045791 |
| C  | 3.464670  | -3.006264 | -2.302102 |
| C  | 4.204714  | -3.939767 | -1.555110 |
| C  | 3.536739  | -4.642671 | -0.546861 |
| C  | 2.178775  | -4.418622 | -0.289010 |
| H  | 1.684936  | -4.988151 | 0.497302  |
| H  | 4.676149  | 0.804467  | 2.103915  |
| H  | -5.195921 | 4.921939  | -0.699921 |
| Cu | -1.835777 | 1.637589  | 1.495973  |
| O  | -1.582342 | 0.404766  | -0.046487 |
| Cu | -0.045219 | -0.613812 | 0.764281  |
| H  | 2.850958  | 3.913305  | -0.268646 |
| H  | 1.641810  | 0.430079  | 3.864539  |
| C  | -0.479724 | 0.270925  | 3.527031  |
| H  | -1.254226 | -0.512884 | 3.609439  |
| H  | -1.249785 | 1.299939  | 5.314215  |
| C  | 0.844077  | -0.305016 | 4.027032  |
| H  | 0.783919  | -0.485852 | 5.107765  |
| H  | 2.068260  | -2.078841 | 3.864426  |
| C  | -0.983451 | 1.508627  | 4.272412  |
| H  | -0.218600 | 2.290559  | 4.248323  |
| H  | -2.973327 | 1.424984  | 3.737022  |
| C  | 1.188300  | -1.647322 | 3.369723  |
| H  | 1.388578  | -2.574289 | 1.573922  |
| H  | 0.355508  | -2.342492 | 3.522701  |
| N  | 1.436258  | -1.608334 | 1.894927  |
| H  | 4.720658  | 3.149536  | 1.232420  |
| H  | 3.504099  | -1.298961 | 2.325104  |
| C  | 2.792732  | -1.122520 | 1.510061  |
| H  | 3.113327  | -1.732519 | 0.658317  |
| H  | 1.027668  | 2.293855  | -0.809423 |
| C  | 3.890149  | 1.169251  | 1.449586  |
| C  | 3.912089  | 2.476539  | 0.962240  |
| C  | 2.877107  | 2.904717  | 0.130930  |
| C  | 1.860475  | 2.000484  | -0.174612 |
| N  | 1.841161  | 0.741333  | 0.280054  |
| C  | 2.835525  | 0.329954  | 1.082196  |
| N  | -2.159976 | 1.998459  | 3.505155  |
| C  | -2.511455 | 3.419776  | 3.663266  |
| H  | -1.578780 | 3.994568  | 3.698587  |
| H  | -3.561343 | 3.027018  | -0.700162 |
| C  | -4.223156 | 4.927176  | 2.554096  |
| C  | -4.909743 | 5.327559  | 1.409087  |
| C  | -4.681254 | 4.647033  | 0.214372  |
| C  | -3.777876 | 3.589288  | 0.202297  |
| N  | -3.109301 | 3.205688  | 1.308327  |
| C  | 5.673950  | -4.162734 | -1.832179 |
| H  | 5.855178  | -4.358150 | -2.896102 |
| H  | 6.269386  | -3.280202 | -1.564196 |



**Coordinates (Å) and energies of the assembly derived from complex R-3 and galactonoamidine 1 with two binding sites**

- **Gas phase**

Total Energy = -5151.561976775 Eh; -3232653.922kcal/mol

Standard thermodynamic quantities at 298.180 K and 1.000 ATM:

- This Molecule has 0 Imaginary Frequencies
- Zero point vibrational energy: 426.053 kcal/mol
- Total Enthalpy: 451.381 kcal/mol
- Total Entropy: 239.907 cal/mol K

- **COSMO (Solvent = water)**

Total Energy = -5151.653408002 Eh; -3232711.296 kcal/mol

Total energy + OC corr. = -5151.650502771 Eh

Dielectric energy = -0.105574390 Eh

Dielectric energy + OC corr. = -0.102669159 Eh

$\alpha$ -spin:

E = -0.060 Eh (LUMO)

E = -0.184Eh (HOMO)

$\beta$ -spin:

E = -0.115 Eh (LUMO)

E = -0.181Eh (HOMO)

Coordinates (Å)

| ATOM | X         | Y         | Z         |
|------|-----------|-----------|-----------|
| N    | -2.460343 | -0.121751 | 2.444868  |
| C    | -3.652839 | 0.703986  | 2.396818  |
| C    | -3.605023 | 2.014782  | 1.566119  |
| C    | -2.178648 | 2.524904  | 1.382978  |
| C    | -1.287741 | 1.405911  | 0.831583  |
| C    | -1.390295 | 0.180082  | 1.771004  |
| H    | -3.880594 | 1.015963  | 3.430902  |
| H    | -1.667912 | 1.116655  | -0.161080 |
| H    | 0.785752  | -1.878546 | 3.072034  |
| C    | -4.816903 | -0.193820 | 1.930746  |
| H    | -4.187328 | 2.786132  | 2.088994  |
| H    | -1.770188 | 2.844654  | 2.349010  |
| O    | 2.533242  | 1.694581  | 0.631586  |
| H    | -2.980104 | 3.547022  | -0.035480 |
| H    | -4.960467 | -1.009383 | 2.649458  |
| H    | -4.560780 | -0.633853 | 0.964110  |
| O    | -6.042638 | 0.525786  | 1.716531  |
| O    | -4.129380 | 1.875560  | 0.233644  |
| H    | -0.362239 | 5.416697  | -5.319875 |
| O    | -2.197324 | 3.676979  | 0.533563  |
| H    | 2.035700  | 5.079221  | -4.693638 |
| H    | -2.499967 | -4.371722 | -0.382515 |
| H    | -6.321398 | 0.904761  | 2.566799  |
| H    | -5.074343 | 1.660501  | 0.358702  |
| H    | 3.658867  | 4.576356  | -2.821779 |
| H    | -3.100607 | -7.278213 | 1.763900  |
| N    | -0.248514 | -0.556007 | 1.846283  |
| H    | -1.515771 | -2.227870 | 0.367343  |
| C    | 1.545487  | 4.127389  | -2.831026 |
| C    | -0.251458 | -1.674520 | 2.771200  |

|    |           |           |           |
|----|-----------|-----------|-----------|
| H  | -0.788650 | -1.390649 | 3.688893  |
| H  | -1.336404 | -6.193009 | 3.329182  |
| C  | -0.863484 | -2.980767 | 2.265879  |
| C  | -1.472663 | -3.097741 | 1.014468  |
| C  | -2.027174 | -4.310996 | 0.596136  |
| C  | -1.991691 | -5.448149 | 1.411634  |
| C  | -1.378762 | -5.328292 | 2.669207  |
| C  | -0.823798 | -4.119125 | 3.085585  |
| H  | -0.356636 | -4.056448 | 4.067666  |
| H  | 2.120077  | -4.069604 | -1.833698 |
| H  | -2.148335 | 4.636716  | -3.733510 |
| Cu | 1.312072  | 2.837954  | -0.329902 |
| O  | 0.062269  | 1.809378  | 0.747651  |
| Cu | 1.277177  | 0.240918  | 0.939821  |
| H  | 0.026842  | -1.237463 | -4.327999 |
| H  | 5.651623  | 0.624920  | 0.135652  |
| C  | 3.705119  | 1.537945  | -0.148589 |
| H  | 3.453970  | 1.091677  | -1.127431 |
| H  | 4.514145  | 3.425255  | 0.537716  |
| C  | 4.646254  | 0.576831  | 0.573400  |
| H  | 4.732251  | 0.876774  | 1.625091  |
| H  | 4.911176  | -1.552791 | 0.884532  |
| C  | 4.214457  | 2.959760  | -0.404497 |
| H  | 5.061245  | 2.988932  | -1.098420 |
| H  | 3.074629  | 4.688656  | -0.559709 |
| C  | 4.174291  | -0.875240 | 0.436902  |
| H  | 2.951382  | -1.401478 | 2.004357  |
| H  | 4.124872  | -1.116270 | -0.629280 |
| N  | 2.825671  | -1.201830 | 1.012133  |
| H  | 1.025708  | -3.526409 | -4.015599 |
| H  | 3.071024  | -3.195968 | 0.280160  |
| C  | 2.293176  | -2.426609 | 0.367241  |
| H  | 1.503511  | -2.833514 | 1.005741  |
| H  | 0.180881  | 0.389927  | -2.441768 |
| C  | 1.675053  | -3.094009 | -2.004711 |
| C  | 1.064522  | -2.788212 | -3.219991 |
| C  | 0.510699  | -1.519593 | -3.398735 |
| C  | 0.598717  | -0.609908 | -2.347715 |
| N  | 1.184119  | -0.898134 | -1.175955 |
| C  | 1.707186  | -2.122922 | -1.000295 |
| N  | 3.058434  | 3.744746  | -0.944162 |
| C  | 2.969687  | 3.827853  | -2.417526 |
| H  | 3.266103  | 2.856997  | -2.831635 |
| H  | -1.437071 | 3.576494  | -1.569864 |
| C  | 1.236764  | 4.749553  | -4.037821 |
| C  | -0.101226 | 4.935912  | -4.382319 |
| C  | -1.096661 | 4.505340  | -3.504501 |
| C  | -0.718626 | 3.905191  | -2.309818 |
| N  | 0.573794  | 3.717702  | -1.981858 |
| C  | -2.571910 | -6.766645 | 0.951208  |
| H  | -3.275517 | -6.625897 | 0.123873  |
| H  | -1.786536 | -7.450000 | 0.600399  |
